# Supplementary material for: An open-source programmable smart pipette for portable cell separation and counting
Source: Royal Society of Chemistry journal article supplement (doi:10.1039/c9ra08368e), 2019-01-01
Supplement: c9ra08368e1.pdf [file c9ra08368e1.pdf]

## **Supporting Information**

# **An open-source programmable smart pipette for portable cell separation and counting**

Eunjung Lee,\* Byeongyeon Kim,\* and Sungyoung Choi\*\*

Department of Biomedical Engineering, Hanyang University, Seoul 04763, Republic of Korea

### **Contents:**

|                                            |           |
|--------------------------------------------|-----------|
| <b>1. Supplementary figures.....</b>       | <b>2</b>  |
| <b>2. Supplementary table.....</b>         | <b>5</b>  |
| <b>3. Supplementary videos.....</b>        | <b>6</b>  |
| <b>4. Supplementary Arduino codes.....</b> | <b>7</b>  |
| <b>5. Supplementary Matlab codes.....</b>  | <b>15</b> |

## 1. Supplementary Figures

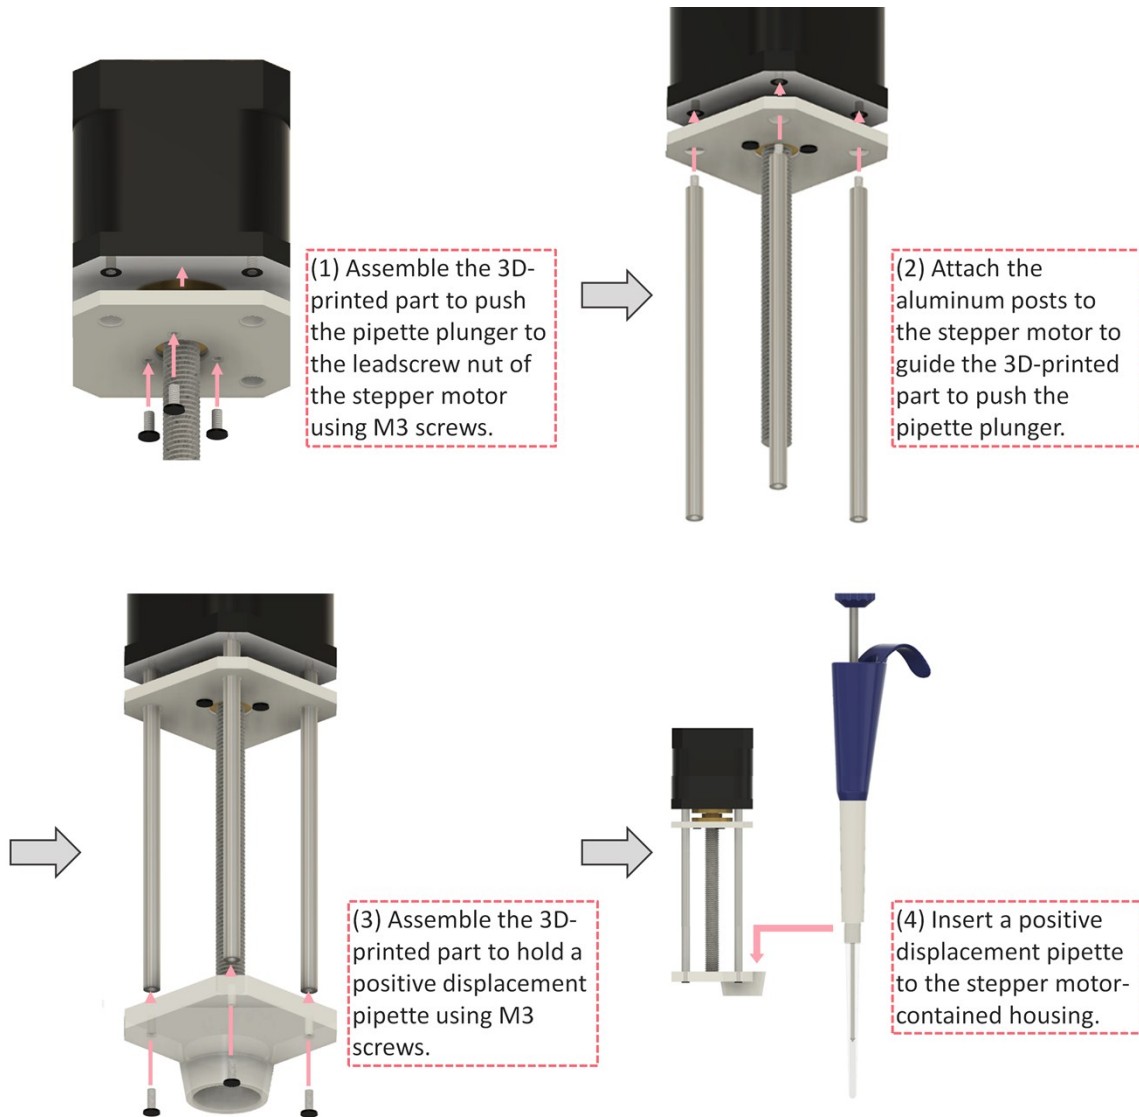

**Figure S1.** Assembly process of the smart pipette.

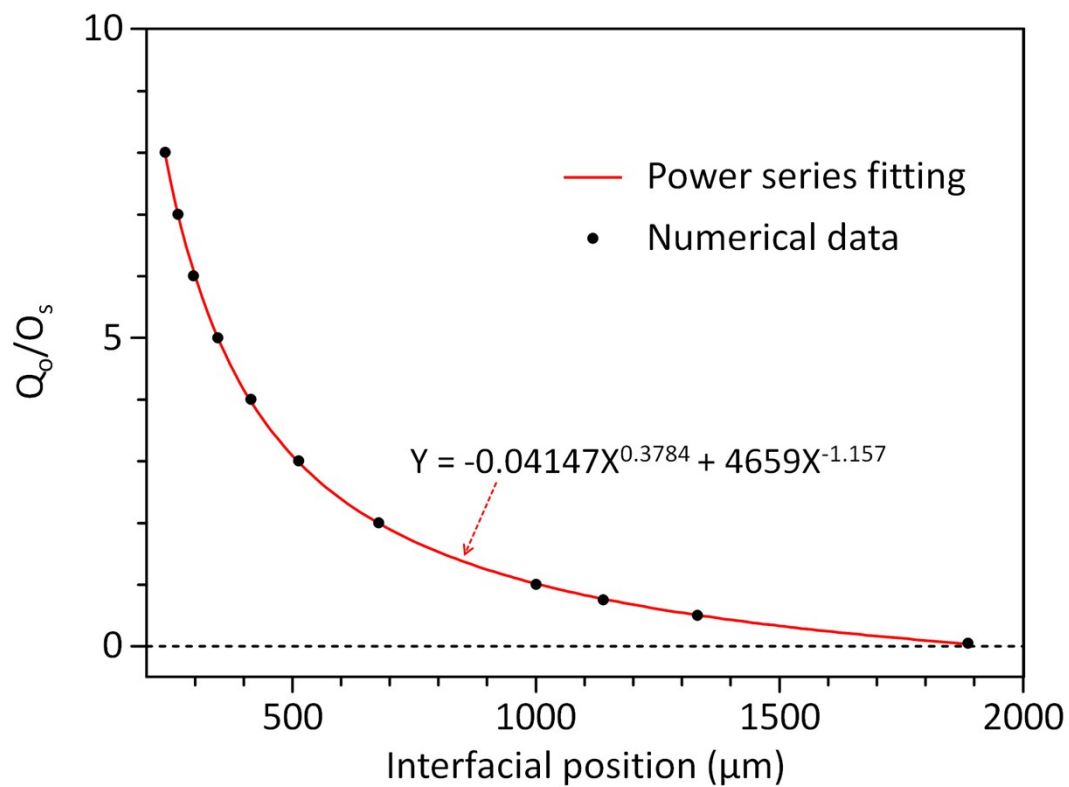

**Figure S2.** Nonlinear relationship between the flow rate ratio of  $Q_o$  to  $Q_s$  and the interfacial position. The  $Q_o$  value was calculated by measuring the interfacial position in the microfluidic comparator and obtaining the ratio,  $Q_o/Q_s$  from the power series fitting.

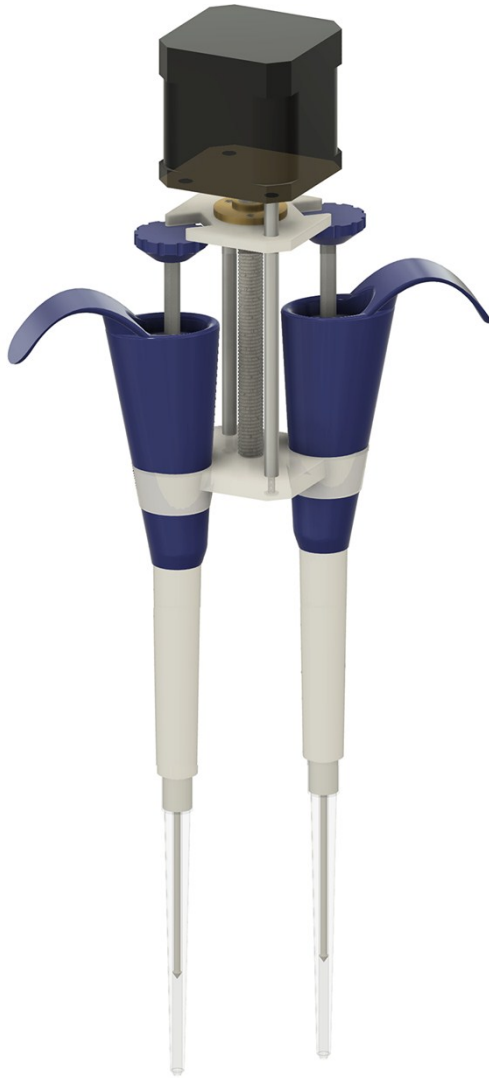

**Figure S3.** Potential design of the smart pipette which can hold and control two positive-displacement pipettes.

### 3. Supplementary Table

**Table S1.** List of parts for the smart pipette assembly.

| <b>Part name</b>                                                      | <b>Product number</b>                       | <b>Manufacturer</b>                            | <b>Cost (\$)</b>  |
|-----------------------------------------------------------------------|---------------------------------------------|------------------------------------------------|-------------------|
| Arduino                                                               | Arduino Uno R3                              | SparkFun Corp,<br>United States                | 22                |
| Stepper motor driver                                                  | A4988                                       | Allegro MicroSystems, LLC,<br>United States    | 0.8               |
| Stepper motor<br>(containing a lead<br>screw and a lead<br>screw nut) | SL42STH40-1684A-<br>300                     | Changzhou Fulling Motor<br>Co., Ltd.,<br>China | 21                |
| Positive<br>displacement<br>pipette tip                               | Prstrl 180/3 C-250                          | METTLER TOLEDO Corp,<br>United States          | 0.4               |
| Positive<br>displacement<br>pipette                                   | Positive-<br>Displacement Pipette<br>MR-250 | METTLER TOLEDO Corp,<br>United States          | 410               |
| Aluminum posts                                                        | Custom-made<br>products                     | Doo Kyoung Corp.,<br>Korea                     | 30<br>(each post) |
| 3D-printed holder                                                     |                                             |                                                | 4                 |
| 3D-printed push<br>block                                              |                                             |                                                | 3                 |

### 3. Supplementary Videos

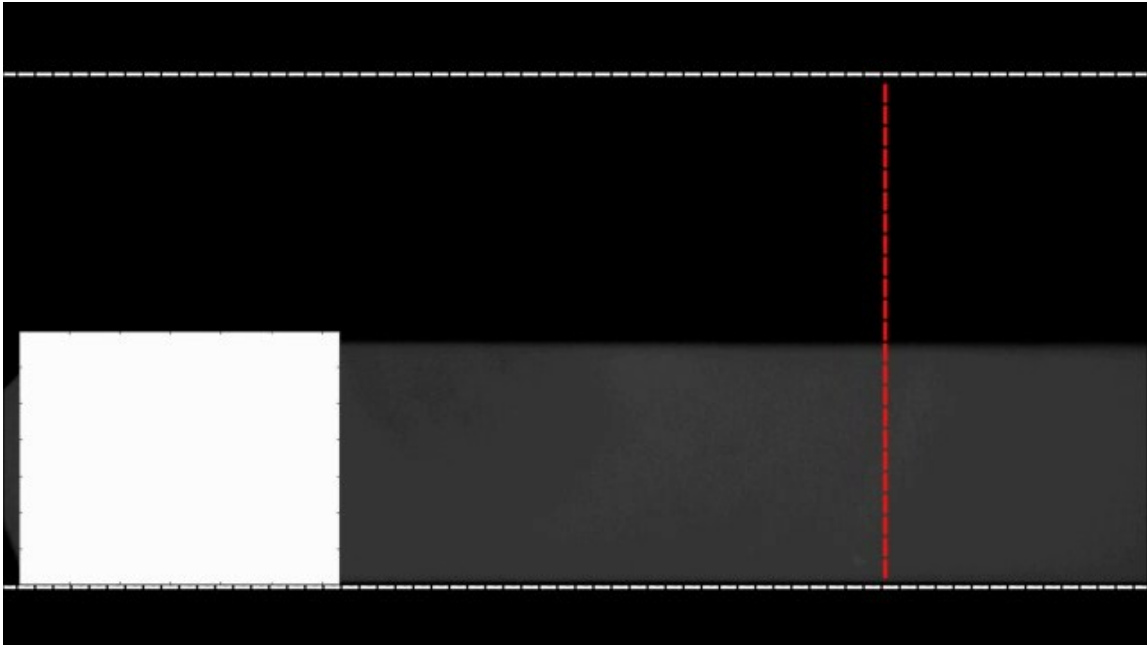

**Movie S1.** Flow-rate response of the OS pipette to pulse commands for a set flow rate of  $97.4 \mu\text{L}/\text{min}$ . The set pulse widths were 0.5, 0.9, 2, 4, 8 and 12 seconds in order. The dotted red line denotes the ROI for interfacial position measurement.

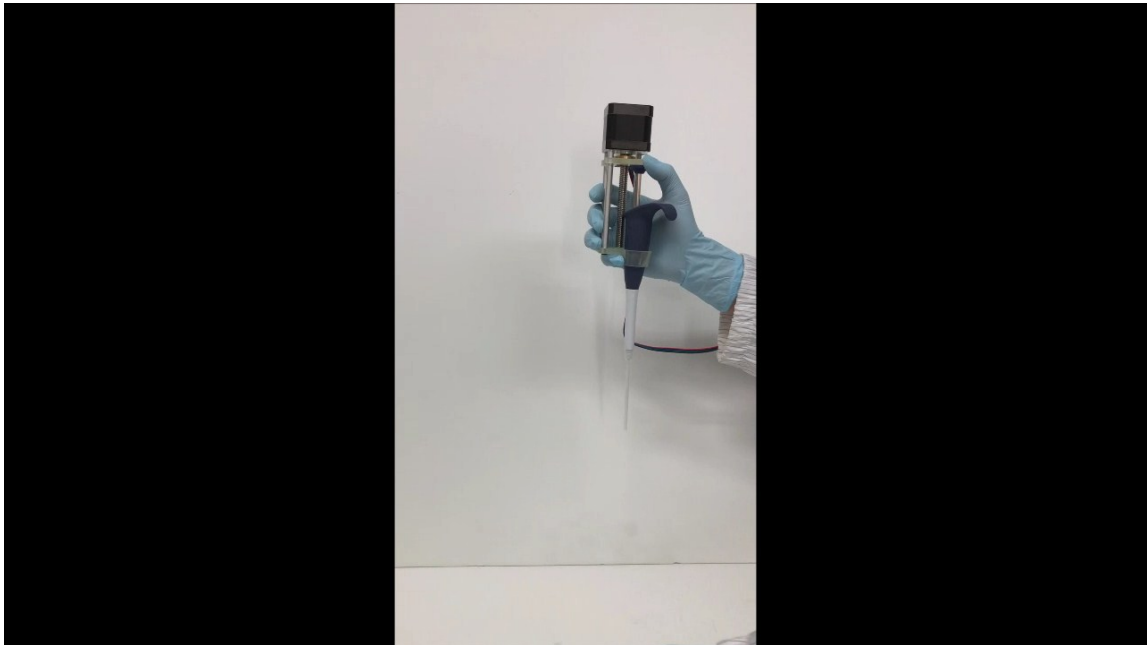

**Movie S2.** Handheld operation of the microfluidic plasma separator using the OS pipette.

## 4. Supplementary Arduino Codes

### 4.1. Constant flow-rate generation

```
const int enable=11;
const int stepper=9;
const int direc=10;

void setup() {
pinMode(enable,OUTPUT);
pinMode(stepper, OUTPUT);
pinMode(direc, OUTPUT);

digitalWrite(enable, LOW);// Disable enable pin
Serial.begin(9600);// put your setup code here, to run once:
}

void loop() {
int index;

delay(100);
    digitalWrite(direc,LOW);//Set up direction

    for(index=0;index<14800;index++)
    {
        digitalWrite(stepper, HIGH);
        delay(25);
        digitalWrite(stepper, LOW);
        delay(25);//Set up stepper motor velocity 19.5ul/min
    }

    delay(10000);
```

```
}
```

## 4.2. Pulsed flow-rate generation

```
const int enable=11;
```

```
const int stepper=9;
```

```
const int direc=10;
```

```
void setup() {
```

```
  pinMode(enable,OUTPUT);
```

```
  pinMode(stepper, OUTPUT);
```

```
  pinMode(direc, OUTPUT);
```

```
  digitalWrite(enable, LOW);// Disable enable pin
```

```
  Serial.begin(9600);// put your setup code here, to run once:
```

```
}
```

```
void loop() {
```

```
  int index;
```

```
  delay(100);
```

```
    digitalWrite(direc,LOW);//Set up direction
```

```
  for(index=0;index<300;index++)
```

```
  {
```

```
    digitalWrite(stepper, HIGH);
```

```
    delay(25);
```

```
    digitalWrite(stepper, LOW);
```

```
    delay(25);
```

```
  }//Set up stepper motor velocity 19.5ul/min
```

```
  for(index=0;index<53;index++)
```

```
  {
```



```

digitalWrite(stepper, HIGH);
delayMicroseconds(5000);
digitalWrite(stepper, LOW);
delayMicroseconds(5000);
} //Set up stepper motor velocity 100ul/min for 0.5s
for(index=0;index<212;index++)
{
digitalWrite(stepper, HIGH);
delay(25);
digitalWrite(stepper, LOW);
delay(25);
} //Set up stepper motor velocity 19.5ul/min for 10s
for(index=0;index<95;index++)
{
digitalWrite(stepper, HIGH);
delayMicroseconds(5000);
digitalWrite(stepper, LOW);
delayMicroseconds(5000);
} //Set up stepper motor velocity 100ul/min for 0.9s
for(index=0;index<212;index++)
{
digitalWrite(stepper, HIGH);
delay(25);
digitalWrite(stepper, LOW);
delay(25);
}
for(index=0;index<211;index++)
{
digitalWrite(stepper, HIGH);
delayMicroseconds(5000);
digitalWrite(stepper, LOW);
delayMicroseconds(5000);
} //Set up stepper motor velocity 100ul/min for 2s

```

```

for(index=0;index<212;index++)
{
    digitalWrite(stepper, HIGH);
    delay(25);
    digitalWrite(stepper, LOW);
    delay(25);
}
for(index=0;index<422;index++)
{
    digitalWrite(stepper, HIGH);
    delayMicroseconds(5000);
    digitalWrite(stepper, LOW);
    delayMicroseconds(5000);
} //Set up stepper motor velocity 100ul/min for 4s
for(index=0;index<212;index++)
{
    digitalWrite(stepper, HIGH);
    delay(25);
    digitalWrite(stepper, LOW);
    delay(25);
}
for(index=0;index<844;index++)
{
    digitalWrite(stepper, HIGH);
    delayMicroseconds(5000);
    digitalWrite(stepper, LOW);
    delayMicroseconds(5000);
} //Set up stepper motor velocity 100ul/min for 8s
for(index=0;index<212;index++)
{
    digitalWrite(stepper, HIGH);
    delay(25);
    digitalWrite(stepper, LOW);

```

```

    delay(25);
}
for(index=0;index<1266;index++)
{
    digitalWrite(stepper, HIGH);
    delayMicroseconds(5000);
    digitalWrite(stepper, LOW);
    delayMicroseconds(5000);
} //Set up stepper motor velocity 100ul/min for 12s
for(index=0;index<500;index++)
{
    digitalWrite(stepper, HIGH);
    delay(25);
    digitalWrite(stepper, LOW);
    delay(25);
}
delay(10000);
}

```

### 4.3. Stepped flow-rate generation

```

const int enable=11;
const int stepper=9;
const int direc=10;

void setup() {
    pinMode(enable,OUTPUT);
    pinMode(stepper, OUTPUT);
    pinMode(direc, OUTPUT);

    digitalWrite(enable, LOW);
    Serial.begin(9600);// put your setup code here, to run once:
}

```

```

void loop() {
int index;

delay(100);
  digitalWrite(direc,LOW);

for(index=0;index<250;index++)
{
  digitalWrite(stepper, HIGH);
  delay(25);
  digitalWrite(stepper, LOW);
  delay(25);
}
for(index=0;index<338;index++)
{
  digitalWrite(stepper, HIGH);
  delayMicroseconds(12500);
  digitalWrite(stepper, LOW);
  delayMicroseconds(12500);
}
//Set up stepper motor velocity 39.0ul/min for 8s
for(index=0;index<506;index++)
{
  digitalWrite(stepper, HIGH);
  delayMicroseconds(8333);
  digitalWrite(stepper, LOW);
  delayMicroseconds(8333);
}
//Set up stepper motor velocity 57.8ul/min for 8s
for(index=0;index<666;index++)
{
  digitalWrite(stepper, HIGH);
  delayMicroseconds(6250);
  digitalWrite(stepper, LOW);

```

```

    delayMicroseconds(6250);
} //Set up stepper motor velocity 78.0ul/min for 8s
for(index=0;index<844;index++)
{
    digitalWrite(stepper, HIGH);
    delayMicroseconds(5000);
    digitalWrite(stepper, LOW);
    delayMicroseconds(5000);
} //Set up stepper motor velocity 97.4ul/min for 8s
for(index=0;index<666;index++)
{
    digitalWrite(stepper, HIGH);
    delayMicroseconds(6250);
    digitalWrite(stepper, LOW);
    delayMicroseconds(6250);
} //Set up stepper motor velocity 78.0ul/min for 8s
for(index=0;index<506;index++)
{
    digitalWrite(stepper, HIGH);
    delayMicroseconds(8333);
    digitalWrite(stepper, LOW);
    delayMicroseconds(8333);
} //Set up stepper motor velocity 57.8ul/min for 8s
for(index=0;index<338;index++)
{
    digitalWrite(stepper, HIGH);
    delayMicroseconds(12500);
    digitalWrite(stepper, LOW);
    delayMicroseconds(12500);
} //Set up stepper motor velocity 39.0ul/min for 8s
for(index=0;index<500;index++)
{
    digitalWrite(stepper, HIGH);

```

```
delay(25);  
digitalWrite(stepper, LOW);  
delay(25);  
}
```

```
delay(10000);  
}
```

## 5. Supplementary Matlab Codes

### 5.1. MATLAB code for interfacial position measurement

```
vid = VideoReader('50-3.avi');%Read video
numFrames = vid.NumberOfFrames;
A=zeros(1800,1);
for w=1:1800

    image=read(vid,w);%Read frame
    n=0;
    for k=1:1:300

        B=impixel(J, 300, k);
        C=B(1,1); %Get image intensity information
        if C>60
            n=n+1;
        end % Measure interfacial position
        A(w,1)=n;
    end
end
xlswrite('50-3',A);
```

### 5.2. MATLAB code for analyzing fluorescence bead images

```
vid = VideoReader('10-3.avi');%Read video
numFrames = vid.NumberOfFrames;
n=0;
for w=1:numFrames
    image=read(vid,w); % Read frame
    I=rgb2gray(image);
    for m=1:1:112
```

```
B=impixel(I, m+199, 400);  
C=B(1,1);  
A(w,m)=C;% Get image intensity information  
  
end  
end  
xlswrite('10-3',A);
```
